# Supplementary material for: Pseudomonas putida Represses JA- and SA-Mediated Defense Pathways in Rice and Promotes an Alternative Defense Mechanism Possibly through ABA Signaling
Source: PubMed Central journal article supplement (PMC7760693; doi:10.3390/plants9121641), 2020-11-24
Supplement: plants-09-01641-s001.pdf [file plants-09-01641-s001.pdf]

## Supplementary Material

# *Pseudomonas putida* Represses JA- and SA-Mediated Defense Pathways in Rice and Promotes an Alternative Defense Mechanism Possibly through ABA Signaling

Rui Wang <sup>1, #</sup>, Hai-Lin Wang <sup>1, #</sup>, Rui-Ping Tang <sup>1</sup>, Meng-Ying Sun <sup>1</sup>, Tang-Min Chen <sup>1</sup>, Xu-Chu Duan <sup>1</sup>, Xiao-Feng Lu <sup>1</sup>, Dong Liu <sup>1</sup>, Xin-Chi Shi <sup>1, \*</sup>, Pedro Laborda <sup>1, \*</sup> and Su-Yan Wang <sup>1, \*</sup>

School of Life Sciences, Nantong University, Nantong 226019, People's Republic of China

<sup>#</sup>These authors contributed equally.

\*Corresponding authors:

Dr. Suyan Wang; email: wangsuyan@ntu.edu.cn

Prof. Pedro Laborda; email: pedro@ntu.edu.cn

Dr. Xinchu Shi; email: shxch0301@ntu.edu.cn

**Table S1.** Primers used in qRT-PCR.

| <b>Gene</b>     | <b>RGAP number</b> | <b>Primer_F(5' - 3')</b> | <b>Primer_R(5' - 3')</b>  |
|-----------------|--------------------|--------------------------|---------------------------|
| <i>OsACC1</i>   | Os03g0727600       | GTGTTCGTCCCAGACGCAGTA    | TCCACCCAGCAGAAGAGGC       |
| <i>OsACC3</i>   | Os05g0196600       | GGGTTTGACAGGGACTTGA      | GTTCGACGGGTTCTGTGAT       |
| <i>OsPR1a</i>   | Os01g0382000       | TGGGTGTCTGGAGAAGCAGTG    | GGTGATGAAGACGCCGAGG       |
| <i>OsPR1b</i>   | Os07g0129200       | ACGCCTTACGGTCCATAC       | AAACAGAAAGAAACAGAGGGAGTAC |
| <i>OsPR2</i>    | Os01g0940700       | TTGCGGCCATTCTACAGT       | TGGTGAGGGCGATGCTTG        |
| <i>OsPR3</i>    | Os04g0493400       | ACCGCACCAACGACGACT       | TGTCTGGGTCCCTTAGCC        |
| <i>OsPR4a</i>   | Os11g0592200       | GCAAGTGTATCCAGGTGAAGAA   | ACCCATCTGGTAGCCACGAC      |
| <i>OsPR4b</i>   | Os11g0592100       | TGGATGGACCGCCTTCTGT      | CGTCGCTGTCGATCTTGGAG      |
| <i>OsPR5</i>    | Os12g0628600       | CTGACGCTGGCGGAGTTC       | CTTGGTGTGTCTTCGGGGA       |
| <i>OsPR6a</i>   | Os01g0124650       | GCAGCCGCTCGATGTTGT       | AAGATGAAGACCGCCATGACTA    |
| <i>OsPR6b</i>   | Os01g0803200       | GAACGAGAACGACCTCCACC     | AGTACAAAGTGCCAGCGACAAC    |
| <i>OsPR8a</i>   | Os02g0771700       | CCCGTTCTTCGCGTACTCTG     | GTCTCCTTGGCGTCACCCT       |
| <i>OsPR8b</i>   | Os10g0416500       | ACCCGAACATCGCCACC        | CCTGCTCGTCGTAGAATCA       |
| <i>OsPR8c</i>   | Os01g0860500       | ACCAGGTCGCTCGTCTCCA      | AACCCGCCGTGCCAGTA         |
| <i>OsPR9</i>    | Os07g0677200       | GGCAAATACCGACCTCCCT      | TCGTTGTAGATCCTGTCCCTGA    |
| <i>OsPR10</i>   | Os12g0555500       | ACACTCGACGGAGACGAAGC     | CAGGGTGAGCGACGAGGTA       |
| <i>OsNPR1</i>   | Os01g0194300       | TTTCCGATGGAGGCAAGAG      | GCTGTCATCCGAGCTAAGTGTT    |
| <i>OsACO</i>    | Os01g0580500       | TCAATGGCTACCACGTTAGATG   | GATGTGACAGCCAAGAATTTCA    |
| <i>OsLOX</i>    | Os03g0738600       | GCATCCCCAACAGCACATC      | AATAAAGATTTGGGAGTGACATA   |
| <i>OsMPK6</i>   | Os10g0533600       | ATGGGTTCCGTCCTGAAGGC     | CACTGAGCTGATAGGGTCCG      |
| <i>OsGAMYB</i>  | Os01g0812000       | GGGATCTGGAGAGCAAGTAATG   | GGATCAGCTGTATTCCCAGAAA    |
| <i>OsYAB4</i>   | Os02g0643200       | TTTCCCTCACATCCATTTTGG    | AGAACCATCCTGAGGCTTGAAG    |
| <i>OsABI5</i>   | Os01g0859300       | ACACACCGGCCAATCGAT       | AGCGGGAAACACAAAGTGAAG     |
| <i>OsHDA702</i> | Os06t0583400       | TTGAGGTATCTGCCGTAGTC     | CATGGTTTTCGACGTGTTCTA     |
| <i>OsHDA705</i> | Os08g0344100       | GCATTGATGATGATACCTTTCGTG | GGCTGAGAAACCGACCTCTG      |
| <i>OsActin</i>  | Os03g0718100       | ATGCTATCCCTCGTCTCGAC     | CGCACTTCATGATGGAGTTG      |

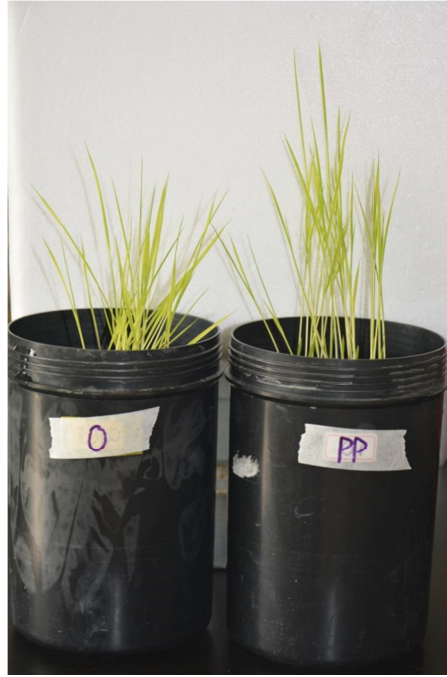

**Figure S1.** Cultivation of *O. sativa* 'Nipponbare' plants in pots with 0 and  $2 \times 10^9$  cells/mL *P. putida*. The images were taken 2 days after the bacterial treatment.

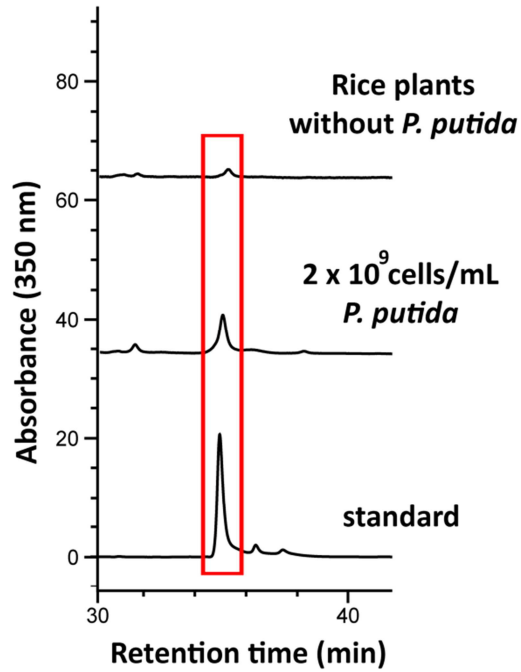

**Figure S2.** HPLC-based analysis of labelled ACC in the medium of *P. putida* treated rice plants. The labelling was carried out using the Marfey's reagent.

HPLC conditions: reverse phase HPLC (Agilent 1200 Series, United States) at 350 nm using an Eclipse XDB-C18 column (250 × 4.6 mm, Agilent) at 35 °C. The mobile phase was 0% to 60% CH<sub>3</sub>CN in H<sub>2</sub>O from 0 to 60 min, 90% CH<sub>3</sub>CN in H<sub>2</sub>O from 60 to 70 min, and 0% CH<sub>3</sub>CN in H<sub>2</sub>O from 70 to 75 min (column temperature: 30 °C; injection volume: 5 μL).

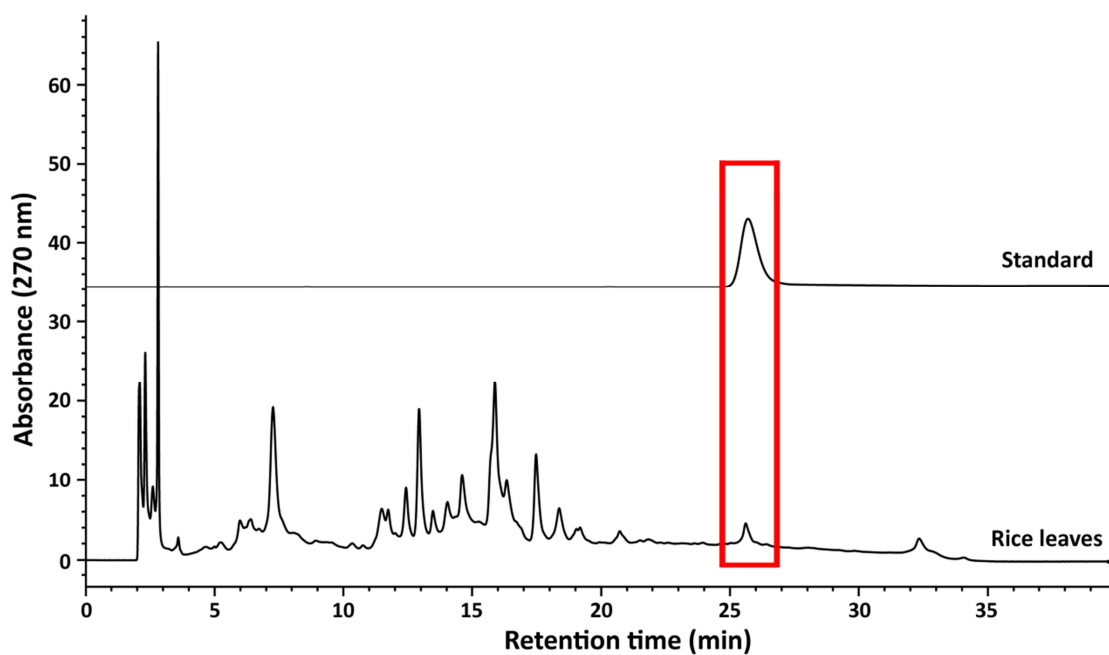

**Figure S3.** HPLC-based analysis of ABA in rice leaves.

HPLC conditions: reversed phase HPLC (Agilent 1200 Series, United States) at 270 nm using an Eclipse XDB-C18 column (250 × 4.6 mm, Agilent). The mobile phase was 5% to 50% CH<sub>3</sub>CN in H<sub>2</sub>O from 0 to 30 min, and 5% CH<sub>3</sub>CN in H<sub>2</sub>O from 30 to 40 min (column temperature: 30 °C; injection volume: 20 μL).
